# Supplementary material for: Diabetes treatments and risk of amputation, blindness, severe kidney failure, hyperglycaemia, and hypoglycaemia: open cohort study in primary care
Source: PubMed Central journal article supplement — BMJ. 2016 Mar 30;352:i1450. doi: 10.1136/bmj.i1450 (PMC4816603; doi:10.1136/bmj.i1450), 2016-03-30
Supplement: hipj030145.ww1_default.pdf [file hipj030145.ww1_default.pdf]

| Group Name                                              | ReadTerm | ReadDesc                                                            |
|---------------------------------------------------------|----------|---------------------------------------------------------------------|
| Dialysis or kidney transplant                           | 14V2     | H/O: renal dialysis                                                 |
| Dialysis or kidney transplant                           | 14V2-1   | H/O: kidney dialysis                                                |
| Dialysis or kidney transplant                           | 7B00     | Transplantation of kidney                                           |
| Dialysis or kidney transplant                           | 7B00-97  | Kidney replacement NOS                                              |
| Dialysis or kidney transplant                           | 7B00-98  | Renal transplant                                                    |
| Dialysis or kidney transplant                           | 7B00-99  | Kidney replacement                                                  |
| Dialysis or kidney transplant                           | 7B000    | Autotransplant of kidney                                            |
| Dialysis or kidney transplant                           | 7B001    | Transplantation of kidney from live donor                           |
| Dialysis or kidney transplant                           | 7B001-1  | Allotransplantation of kidney from live donor                       |
| Dialysis or kidney transplant                           | 7B002    | Transplantation of kidney from cadaver                              |
| Dialysis or kidney transplant                           | 7B002-1  | Allotransplantation of kidney from cadaver                          |
| Dialysis or kidney transplant                           | 7B003    | Allotransplantation of kidney from cadaver, heart-beating           |
| Dialysis or kidney transplant                           | 7B004    | Allotransplantation kidney from cadaver, heart non-beating          |
| Dialysis or kidney transplant                           | 7B005    | Allotransplantation of kidney from cadaver NEC                      |
| Dialysis or kidney transplant                           | 7B00y    | Other specified transplantation of kidney                           |
| Dialysis or kidney transplant                           | 7B00z    | Transplantation of kidney NOS                                       |
| Dialysis or kidney transplant                           | 7L1A0    | Renal dialysis                                                      |
| Dialysis or kidney transplant                           | 7L1A0-1  | Thomas intravascular shunt for dialysis                             |
| Dialysis or kidney transplant                           | 7L1A0-99 | Extracorporeal kidney                                               |
| Renal replacement (dialysis or transplant) (ICD10)      | T824     | T824 - Mechanical complication of vascular dialysis catheter        |
| Renal replacement (dialysis or transplant) (ICD10)      | T861     | T861 - Kidney transplant failure and rejection                      |
| Renal replacement (dialysis or transplant) (ICD10)      | Y602     | Y602 - During kidney dialysis or other perfusion                    |
| Renal replacement (dialysis or transplant) (ICD10)      | Y622     | Y622 - During kidney dialysis or other perfusion                    |
| Renal replacement (dialysis or transplant) (ICD10)      | Y841     | Y841 - Kidney dialysis                                              |
| Renal replacement (dialysis or transplant) (ICD10)      | Z49      | Z49 - Care involving dialysis                                       |
| Renal replacement (dialysis or transplant) (ICD10)      | Z490     | Z490 - Preparatory care for dialysis                                |
| Renal replacement (dialysis or transplant) (ICD10)      | Z491     | Z491 - Extracorporeal dialysis                                      |
| Renal replacement (dialysis or transplant) (ICD10)      | Z940     | Z940 - Kidney transplant status                                     |
| Renal replacement (dialysis or transplant) (ICD10)      | Z992     | Z992 - Dependence on renal dialysis                                 |
| Renal replacement therapy (dialysis or transplant) OPCS | M01      | M01 - Transplantation of kidney                                     |
| Renal replacement therapy (dialysis or transplant) OPCS | M011     | M011 - Autotransplantation of kidney                                |
| Renal replacement therapy (dialysis or transplant) OPCS | M012     | M012 - Allotransplantation of kidney from live donor                |
| Renal replacement therapy (dialysis or transplant) OPCS | M013     | M013 - Allotransplantation of kidney from cadaver NEC               |
| Renal replacement therapy (dialysis or transplant) OPCS | M014     | M014 - Allotransplantation of kidney from cadaver heart beating     |
| Renal replacement therapy (dialysis or transplant) OPCS | M015     | M015 - Allotransplantation of kidney from cadaver heart non-beating |
| Renal replacement therapy (dialysis or transplant) OPCS | M018     | M018 - Other specified transplantation of kidney                    |
| Renal replacement therapy (dialysis or transplant) OPCS | M019     | M019 - Unspecified transplantation of kidney                        |
| Renal replacement therapy (dialysis or transplant) OPCS | X401     | X401 - Renal dialysis                                               |
| Renal replacement therapy (dialysis or transplant) OPCS | X402     | X402 - Peritoneal dialysis NEC                                      |
| Renal replacement therapy (dialysis or transplant) OPCS | X403     | X403 - Haemodialysis NEC                                            |
| Renal replacement therapy (dialysis or transplant) OPCS | X405     | X405 - Automated peritoneal dialysis                                |
| Renal replacement therapy (dialysis or transplant) OPCS | X406     | X406 - Continuous ambulatory peritoneal dialysis                    |
| Renal replacement therapy (dialysis or transplant) OPCS | X408     | X408 - Other specified compensation for renal failure               |
| Renal replacement therapy (dialysis or transplant) OPCS | X409     | X409 - Unspecified compensation for renal failure                   |

**Note**

includes CKD5 based on seum creatinine values from GP records
