# Supplementary material for: Diabetes treatments and risk of amputation, blindness, severe kidney failure, hyperglycaemia, and hypoglycaemia: open cohort study in primary care
Source: PubMed Central journal article supplement — BMJ. 2016 Mar 30;352:i1450. doi: 10.1136/bmj.i1450 (PMC4816603; doi:10.1136/bmj.i1450), 2016-03-30
Supplement: hipj030145.ww2_default.pdf [file hipj030145.ww2_default.pdf]

| <b>Group Name</b> | <b>ReadTerm</b> | <b>ReadDesc</b>                                             |
|-------------------|-----------------|-------------------------------------------------------------|
| Blindness         | 2B6A-1          | O/E - blind R-eye                                           |
| Blindness         | 2B6B            | O/E - R-eye completely blind                                |
| Blindness         | 2B6S            | O/E - pinhole R-eye completely blind                        |
| Blindness         | 2B7A-1          | O/E - blind L-eye                                           |
| Blindness         | 2B7B            | O/E - L-eye completely blind                                |
| Blindness         | 2B7S            | O/E - pinhole L-eye completely blind                        |
| Blindness         | 6688            | Registered partially sighted                                |
| Blindness         | 6688-1          | Registered partially blind                                  |
| Blindness         | 6689            | Registered blind                                            |
| Blindness         | 6689-1          | Registered severely sight impaired                          |
| Blindness         | 668C            | Certificate of vision impairment                            |
| Blindness         | 8F6-1           | Blind rehabilitation                                        |
| Blindness         | 8F61            | Blind rehabilitation                                        |
| Blindness         | 8F62            | Blind lead dog rehabilitation                               |
| Blindness         | 9m08            | Excluded from diabetic retinopathy screening as blind       |
| Blindness         | EGTONBL2        | Blind (subjectively)                                        |
| Blindness         | EGTONVI8        | Vision - blind despite any aid                              |
| Blindness         | F49             | Blindness and low vision                                    |
| Blindness         | F49-1           | Impaired vision                                             |
| Blindness         | F49-2           | Low vision                                                  |
| Blindness         | F49-3           | Partial sight                                               |
| Blindness         | F49-4           | Sight impaired                                              |
| Blindness         | F490            | Blindness, both eyes                                        |
| Blindness         | F490-98         | Blind/low vision - both eyes                                |
| Blindness         | F490-99         | Blind - both eyes                                           |
| Blindness         | F4900           | Unspecified blindness both eyes                             |
| Blindness         | F4902           | Better eye: near total VI, Lesser eye: unspecified          |
| Blindness         | F4903           | Better eye: near total VI, Lesser eye: total VI             |
| Blindness         | F4904           | Better eye: near total VI, Lesser eye: near total VI        |
| Blindness         | F4905           | Better eye: profound VI, Lesser eye: unspecified            |
| Blindness         | F4906           | Better eye: profound VI, Lesser eye: total VI               |
| Blindness         | F4907           | Better eye: profound VI, Lesser eye: near total VI          |
| Blindness         | F4908           | Better eye: profound VI, Lesser eye: profound VI            |
| Blindness         | F4909           | Acquired blindness, both eyes                               |
| Blindness         | F490z           | Blindness both eyes NOS                                     |
| Blindness         | F491            | Better eye: low vision, Lesser eye: profound VI             |
| Blindness         | F4910           | One eye blind, one eye low vision                           |
| Blindness         | F4911           | Better eye: severe VI, Lesser eye: blind, unspecified       |
| Blindness         | F4912           | Better eye: severe VI, Lesser eye: total VI                 |
| Blindness         | F4913           | Better eye: severe VI, Lesser eye: near total VI            |
| Blindness         | F4914           | Better eye: severe VI, Lesser eye: profound VI              |
| Blindness         | F4915           | Better eye: moderate VI, Lesser eye: blind, unspecified     |
| Blindness         | F4916           | Better eye: moderate VI, Lesser eye: total VI               |
| Blindness         | F4917           | Better eye: moderate VI, Lesser eye: near total VI          |
| Blindness         | F4918           | Better eye: moderate VI, Lesser eye: profound VI            |
| Blindness         | F491z           | One eye blind, one eye low vision NOS                       |
| Blindness         | F492            | Low vision, both eyes                                       |
| Blindness         | F4920           | Low vision, both eyes unspecified                           |
| Blindness         | F4921           | Better eye: severe VI, Lesser eye: low vision unspecified   |
| Blindness         | F4922           | Better eye: severe VI, Lesser eye: severe VI                |
| Blindness         | F4923           | Better eye: moderate VI, Lesser eye: low vision unspecified |

|                   |         |                                                                      |
|-------------------|---------|----------------------------------------------------------------------|
| Blindness         | F4924   | Better eye: moderate VI, Lesser eye: severe VI                       |
| Blindness         | F4925   | Better eye: moderate VI, Lesser eye: moderate VI                     |
| Blindness         | F492z   | Low vision, both eyes NOS                                            |
| Blindness         | F493    | Visual loss, both eyes unqualified                                   |
| Blindness         | F493-99 | Blind/low vision - both eyes                                         |
| Blindness         | F494    | Legal blindness USA                                                  |
| Blindness         | F495    | Profound impairment, one eye                                         |
| Blindness         | F4950   | Blindness, one eye, unspecified                                      |
| Blindness         | F4951   | Lesser eye: total visual impairment, Better eye: unspecified         |
| Blindness         | F4952   | Lesser eye: total VI, Better eye: near normal vision                 |
| Blindness         | F4953   | Lesser eye: total VI, Better eye: normal vision                      |
| Blindness         | F4954   | Lesser eye: near total VI, Better eye: unspecified                   |
| Blindness         | F4955   | Lesser eye: near total VI, Better eye: near normal vision            |
| Blindness         | F4956   | Lesser eye: near total VI, Better eye: normal vision                 |
| Blindness         | F4957   | Lesser eye: profound VI, Better eye: unspecified                     |
| Blindness         | F4958   | Lesser eye: profound VI, Better eye: near normal vision              |
| Blindness         | F4959   | Lesser eye: profound VI, Better eye: normal vision                   |
| Blindness         | F495A   | Acquired blindness, one eye                                          |
| Blindness         | F495z   | Profound impairment one eye NOS                                      |
| Blindness         | F496    | Low vision, one eye                                                  |
| Blindness         | F496-99 | Blind/low vision -one eye only                                       |
| Blindness         | F4960   | Low vision, one eye, unspecified                                     |
| Blindness         | F4961   | Lesser eye: severe VI, Better eye: unspecified                       |
| Blindness         | F4962   | Lesser eye: severe VI, Better eye: near normal vision                |
| Blindness         | F4963   | Lesser eye: severe VI, Better eye: normal vision                     |
| Blindness         | F4964   | Lesser eye: moderate VI, Better eye: unspecified                     |
| Blindness         | F4965   | Lesser eye: moderate VI, Better eye: near normal vision              |
| Blindness         | F4966   | Lesser eye: moderate VI, Better eye: normal vision                   |
| Blindness         | F496z   | Low vision, one eye NOS                                              |
| Blindness         | F49y    | Visual loss, one eye, unqualified                                    |
| Blindness         | F49y-99 | Blind/low vision -one eye only                                       |
| Blindness         | F49z    | Visual loss NOS                                                      |
| Blindness         | F49z-1  | Acquired blindness                                                   |
| Blindness         | F49z-99 | Blindness/low vision NOS                                             |
| Blindness         | F49z0   | Charles Bonnet syndrome                                              |
| Blindness (ICD10) | H54     | H54 - Visual impairment including blindness (binocular or monocular) |
| Blindness (ICD10) | H540    | H540 - Blindness, binocular                                          |
| Blindness (ICD10) | H541    | H541 - Severe visual impairment, binocular                           |
| Blindness (ICD10) | H544    | H544 - Blindness, monocular                                          |
| Blindness (ICD10) | H545    | H545 - Severe visual impairment, monocular                           |
| Blindness (ICD10) | H549    | H549 - Unspecified visual impairment (binocular)                     |
