# Supplementary material for: Diabetes treatments and risk of amputation, blindness, severe kidney failure, hyperglycaemia, and hypoglycaemia: open cohort study in primary care
Source: PubMed Central journal article supplement — BMJ. 2016 Mar 30;352:i1450. doi: 10.1136/bmj.i1450 (PMC4816603; doi:10.1136/bmj.i1450), 2016-03-30
Supplement: hipj030145.ww3_default.pdf [file hipj030145.ww3_default.pdf]

| <b>Group Name</b> | <b>ReadTerm</b> | <b>ReadDesc</b>                            |
|-------------------|-----------------|--------------------------------------------|
| Amputation        | 14N4            | H/O: limb amputation                       |
| Amputation        | 14N4-1          | Amputee - limb                             |
| Amputation        | 14N41           | H/O: lower limb amputation                 |
| Amputation        | 14N4Z           | H/O: limb amputation NOS                   |
| Amputation        | 2G42            | O/E - Amputated right leg                  |
| Amputation        | 2G43            | O/E - Amputated left leg                   |
| Amputation        | 2G44            | O/E - Amputated right above knee           |
| Amputation        | 2G45            | O/E - Amputated left above knee            |
| Amputation        | 2G46            | O/E - Amputated right below knee           |
| Amputation        | 2G47            | O/E - Amputated left below knee            |
| Amputation        | 2G4A            | O/E - amputated left midfoot               |
| Amputation        | 2G4B            | O/E - amputated right midfoot              |
| Amputation        | 7L06            | Amputation of leg                          |
| Amputation        | 7L06-99         | Amputation - lower limb                    |
| Amputation        | 7L060           | Hindquarter amputation                     |
| Amputation        | 7L060-1         | Ferre hindquarter amputation               |
| Amputation        | 7L060-2         | Gordon - Taylor hindquarter amputation     |
| Amputation        | 7L060-3         | Jaboulay hindquarter amputation            |
| Amputation        | 7L060-4         | King hindquarter amputation                |
| Amputation        | 7L060-5         | Sorrondo hindquarter amputation            |
| Amputation        | 7L060-6         | Steelquist hindquarter amputation          |
| Amputation        | 7L060-7         | Taylor hindquarter amputation              |
| Amputation        | 7L060-99        | Hind quarter amputation                    |
| Amputation        | 7L061           | Disarticulation of hip                     |
| Amputation        | 7L061-1         | Boyd disarticulation of hip                |
| Amputation        | 7L061-2         | Fitzmaurice - Kelly disarticulation of hip |
| Amputation        | 7L061-99        | Hip disarticulation                        |
| Amputation        | 7L062           | Amputation above knee                      |
| Amputation        | 7L062-1         | Kirk amputation of leg through thigh       |
| Amputation        | 7L062-2         | Amputation of leg through thigh            |
| Amputation        | 7L062-99        | Above knee amputation                      |
| Amputation        | 7L063           | Amputation through knee                    |
| Amputation        | 7L063-1         | Batch disarticulation of knee              |
| Amputation        | 7L063-2         | Callander disarticulation of knee          |
| Amputation        | 7L063-3         | Disarticulation of knee                    |
| Amputation        | 7L063-4         | Gritti-Stokes disarticulation of knee      |
| Amputation        | 7L063-5         | Kirk disarticulation of knee               |
| Amputation        | 7L063-6         | Mazet disarticulation of knee              |
| Amputation        | 7L063-7         | McFaddin disarticulation of knee           |
| Amputation        | 7L063-8         | Slocum disarticulation of knee             |
| Amputation        | 7L063-9         | Spittler disarticulation of knee           |
| Amputation        | 7L063-99        | Knee disarticulation                       |
| Amputation        | 7L064           | Amputation below knee                      |
| Amputation        | 7L064-1         | Boyd amputation of leg below knee          |
| Amputation        | 7L064-2         | Burgess amputation of leg below knee       |
| Amputation        | 7L064-3         | Guyon amputation of leg below knee         |
| Amputation        | 7L064-98        | Below knee amputation                      |
| Amputation        | 7L064-99        | Supramalleolar ankle amputat.              |
| Amputation        | 7L06y           | Other specified amputation of leg          |

|                                       |          |                                            |
|---------------------------------------|----------|--------------------------------------------|
| Amputation                            | 7L06z    | Amputation of leg NOS                      |
| Amputation                            | 7L06z-99 | Amputation lower limb NOS                  |
| Amputation                            | 7L07     | Amputation of foot                         |
| Amputation                            | 7L070    | Amputation through ankle                   |
| Amputation                            | 7L070-1  | Pirogoff amputation of foot through ankle  |
| Amputation                            | 7L070-2  | Syme amputation of foot through ankle      |
| Amputation                            | 7L070-99 | Disarticulation of foot                    |
| Amputation                            | 7L071    | Disarticulation of tarsal bones            |
| Amputation                            | 7L071-1  | Boyd amputation of hindfoot                |
| Amputation                            | 7L071-99 | Amputation foot: mid-tarsal                |
| Amputation                            | 7L072    | Disarticulation tarsometatarsal joint      |
| Amputation                            | 7L072-1  | Lisfranc tarsometatarsal amputation        |
| Amputation                            | 7L072-2  | Tarsometatarsal amputation                 |
| Amputation                            | 7L072-3  | Disarticulation of metatarsal bones        |
| Amputation                            | 7L072-99 | Amputation foot:tarsal-metatar             |
| Amputation                            | 7L073    | Amputation through metatarsal bones        |
| Amputation                            | 7L073-1  | Chopart midtarsal amputation               |
| Amputation                            | 7L073-2  | Ray transmetatarsal amputation             |
| Amputation                            | 7L07y    | Other specified amputation of foot         |
| Amputation                            | 7L07z    | Amputation of foot NOS                     |
| Amputation                            | 7L07z-1  | Hey amputation of foot                     |
| Amputation                            | 7L08     | Amputation of toe                          |
| Amputation                            | 7L080    | Amputation hallux                          |
| Amputation                            | 7L080-1  | Amputation great toe                       |
| Amputation                            | 7L081    | Amputation of phalanx of toe               |
| Amputation                            | 7L082    | Proximal hemiphalangectomy of toe          |
| Amputation                            | 7L083    | Amputation lesser toe                      |
| Amputation                            | 7L084    | Terminalisation of hallux                  |
| Amputation                            | 7L085    | Terminalisation of lesser toe              |
| Amputation                            | 7L08y    | Other specified amputation of toe          |
| Amputation                            | 7L08z    | Amputation of toe NOS                      |
| Amputation                            | 7L08z-1  | Disarticulation of toe NOS                 |
| lower leg amputation (minor or major) | X093     | X093 - Amputation of leg above knee        |
| lower leg amputation (minor or major) | X094     | X094 - Amputation of leg through knee      |
| lower leg amputation (minor or major) | X095     | X095 - Amputation of leg below knee        |
| lower leg amputation (minor or major) | X098     | X098 - Other specified amputation of leg   |
| lower leg amputation (minor or major) | X099     | X099 - Unspecified amputation of leg       |
| lower leg amputation (minor or major) | X10      | X10 - Amputation of foot                   |
| lower leg amputation (minor or major) | X101     | X101 - Amputation of foot through ankle    |
| lower leg amputation (minor or major) | X104     | X104 - Amputation through metatarsal bones |
| lower leg amputation (minor or major) | X108     | X108 - Other specified amputation of foot  |
| lower leg amputation (minor or major) | X109     | X109 - Unspecified amputation of foot      |
| lower leg amputation (minor or major) | X11      | X11 - Amputation of toe                    |
| lower leg amputation (minor or major) | X111     | X111 - Amputation of great toe             |
| lower leg amputation (minor or major) | X112     | X112 - Amputation of phalanx of toe        |
| lower leg amputation (minor or major) | X118     | X118 - Other specified amputation of toe   |
| lower leg amputation (minor or major) | X119     | X119 - Unspecified amputation of toe       |
