# Supplementary material for: Diabetes treatments and risk of amputation, blindness, severe kidney failure, hyperglycaemia, and hypoglycaemia: open cohort study in primary care
Source: PubMed Central journal article supplement — BMJ. 2016 Mar 30;352:i1450. doi: 10.1136/bmj.i1450 (PMC4816603; doi:10.1136/bmj.i1450), 2016-03-30
Supplement: hipj030145.ww4_default.pdf [file hipj030145.ww4_default.pdf]

| <b>Group Name</b>                           | <b>ReadTerm</b> | <b>ReadDesc</b>                                                    |
|---------------------------------------------|-----------------|--------------------------------------------------------------------|
| Diabetic ketoacidosis or hyperosmolar state | C101            | Diabetes mellitus with ketoacidosis                                |
| Diabetic ketoacidosis or hyperosmolar state | C101-99         | Diabetes+ketoacidosis -no coma                                     |
| Diabetic ketoacidosis or hyperosmolar state | C1010           | Diabetes mellitus, juvenile type, with ketoacidosis                |
| Diabetic ketoacidosis or hyperosmolar state | C1011           | Diabetes mellitus, adult onset, with ketoacidosis                  |
| Diabetic ketoacidosis or hyperosmolar state | C101y           | Other specified diabetes mellitus with ketoacidosis                |
| Diabetic ketoacidosis or hyperosmolar state | C101z           | Diabetes mellitus NOS with ketoacidosis                            |
| Diabetic ketoacidosis or hyperosmolar state | C102            | Diabetes mellitus with hyperosmolar coma                           |
| Diabetic ketoacidosis or hyperosmolar state | C1020           | Diabetes mellitus, juvenile type, with hyperosmolar coma           |
| Diabetic ketoacidosis or hyperosmolar state | C1021           | Diabetes mellitus, adult onset, with hyperosmolar coma             |
| Diabetic ketoacidosis or hyperosmolar state | C102z           | Diabetes mellitus NOS with hyperosmolar coma                       |
| Diabetic ketoacidosis or hyperosmolar state | C103            | Diabetes mellitus with ketoacidotic coma                           |
| Diabetic ketoacidosis or hyperosmolar state | C1030           | Diabetes mellitus, juvenile type, with ketoacidotic coma           |
| Diabetic ketoacidosis or hyperosmolar state | C1031           | Diabetes mellitus, adult onset, with ketoacidotic coma             |
| Diabetic ketoacidosis or hyperosmolar state | C103y           | Other specified diabetes mellitus with coma                        |
| Diabetic ketoacidosis or hyperosmolar state | C103y-99        | Diabetes with coma                                                 |
| Diabetic ketoacidosis or hyperosmolar state | C103z           | Diabetes mellitus NOS with ketoacidotic coma                       |
| Diabetic ketoacidosis or hyperosmolar state | C109K           | Hyperosmolar non-ketotic state in type 2 diabetes mellitus         |
| Diabetic ketoacidosis or hyperosmolar state | C10A1           | Malnutrition-related diabetes mellitus with ketoacidosis           |
| Diabetic ketoacidosis or hyperosmolar state | C10FK           | Hyperosmolar non-ketotic state in type 2 diabetes mellitus         |
| Diabetic ketoacidosis or hyperosmolar state | C10FK-1         | Hyperosmolar non-ketotic state in type II diabetes mellitus        |
| Diabetic ketoacidosis or hyperosmolar state | C10FN           | Type 2 diabetes mellitus with ketoacidosis                         |
| Diabetic ketoacidosis or hyperosmolar state | C10FN-1         | Type II diabetes mellitus with ketoacidosis                        |
| Diabetic ketoacidosis or hyperosmolar state | EMISQNU2        | Number of admissions for ketoacidosis                              |
| hyperosmolar or DKA (OPCS)                  | E101            | E101 - Insulin-dependent diabetes mellitus - With ketoacidosis     |
| hyperosmolar or DKA (OPCS)                  | E110            | E110 - Non-insulin-dependent diabetes mellitus - With coma         |
| hyperosmolar or DKA (OPCS)                  | E111            | E111 - Non-insulin-dependent diabetes mellitus - With ketoacidosis |
