# Supplementary material for: Diabetes treatments and risk of amputation, blindness, severe kidney failure, hyperglycaemia, and hypoglycaemia: open cohort study in primary care
Source: PubMed Central journal article supplement — BMJ. 2016 Mar 30;352:i1450. doi: 10.1136/bmj.i1450 (PMC4816603; doi:10.1136/bmj.i1450), 2016-03-30
Supplement: hipj030145.ww5_default.pdf [file hipj030145.ww5_default.pdf]

| <b>Group Name</b>     | <b>ReadTerm</b> | <b>ReadDesc</b>                                             |
|-----------------------|-----------------|-------------------------------------------------------------|
| Hypoglycaemia         | C112            | Hypoglycaemia unspecified                                   |
| Hypoglycaemia         | C112-99         | Hypoglycaemia                                               |
| Hypoglycaemia         | C1120           | Reactive hypoglycaemia NOS                                  |
| Hypoglycaemia         | C1121           | Spontaneous hypoglycaemia NOS                               |
| Hypoglycaemia         | C112z           | Hypoglycaemia unspecified NOS                               |
| Hypoglycaemia         | C11y1           | Drug-induced hypoglycaemia without coma                     |
| Hypoglycaemia         | Cyu30           | [X]Other hypoglycaemia                                      |
| Hypoglycaemia         | EMISCHY2        | Hypoglycaemia                                               |
| Hypoglycaemia         | EMISHGT47       | Hypoglycaemia requiring GP/Paramedic since last appointment |
| Hypoglycaemia (ICD10) | E160            | E160 - Drug-induced hypoglycaemia without coma              |
| Hypoglycaemia (ICD10) | E161            | E161 - Other hypoglycaemia                                  |
| Hypoglycaemia (ICD10) | E162            | E162 - Hypoglycaemia, unspecified                           |
