# Supplementary material for: Diabetes treatments and risk of amputation, blindness, severe kidney failure, hyperglycaemia, and hypoglycaemia: open cohort study in primary care
Source: PubMed Central journal article supplement — BMJ. 2016 Mar 30;352:i1450. doi: 10.1136/bmj.i1450 (PMC4816603; doi:10.1136/bmj.i1450), 2016-03-30
Supplement: hipj030145.ww6_default.pdf [file hipj030145.ww6_default.pdf]

## Web appendix 6: Web tables

**Web table 1 Mean values prior to starting different medication combinations**

|                                                   | age  | Townsend score | HBA1C mmol/mol | BMI kg/m <sup>2</sup> | Cholesterol /HDL ratio | SBP mmHg | Creatinine mol/l |
|---------------------------------------------------|------|----------------|----------------|-----------------------|------------------------|----------|------------------|
| No treatment                                      | 64.6 | 0.4            | 57.6           | 30.5                  | 3.9                    | 132.7    | 87.9             |
| <b>Monotherapy</b>                                |      |                |                |                       |                        |          |                  |
| Metformin alone                                   | 64.1 | 0.5            | 60.0           | 30.8                  | 3.8                    | 132.3    | 83.2             |
| Sulphonylureas alone                              | 70.5 | 0.4            | 63.1           | 28.8                  | 3.8                    | 132.2    | 110.8            |
| Insulin alone                                     | 66.4 | 0.3            | 66.6           | 29.6                  | 3.9                    | 130.2    | 118.5            |
| Glitazones alone                                  | 66.8 | -0.2           | 59.3           | 32.0                  | 3.8                    | 133.3    | 101.4            |
| Gliptins alone                                    | 67.8 | 0.1            | 63.5           | 31.2                  | 3.9                    | 131.5    | 98.3             |
| Other hypoglycaemic treatments alone              | 63.7 | 0.7            | 63.2           | 32.3                  | 4.0                    | 132.3    | 100.6            |
| <b>Dual therapy</b>                               |      |                |                |                       |                        |          |                  |
| Metformin and sulphonylureas                      | 65.5 | 0.7            | 65.3           | 30.3                  | 3.8                    | 132.9    | 87.7             |
| Metformin and insulin                             | 63.5 | 0.6            | 69.4           | 31.1                  | 3.9                    | 131.7    | 87.4             |
| Metformin and glitazones                          | 61.2 | 0.1            | 63.0           | 32.6                  | 3.8                    | 132.8    | 82.5             |
| Metformin and gliptins                            | 61.8 | 0.3            | 65.2           | 32.2                  | 3.8                    | 131.7    | 80.4             |
| Metformin and other hypoglycaemic                 | 59.3 | 0.7            | 66.1           | 34.1                  | 3.9                    | 131.6    | 79.6             |
| Sulphonylureas and insulin                        | 70.7 | 0.3            | 74.4           | 29.2                  | 4.0                    | 131.2    | 134.2            |
| Sulphonylureas and glitazones                     | 70.2 | 0.1            | 65.9           | 31.0                  | 3.8                    | 133.4    | 112.8            |
| Sulphonylureas and gliptins                       | 70.0 | 0.2            | 70.2           | 30.7                  | 3.9                    | 132.5    | 105.9            |
| Sulphonylureas and other hypoglycaemic            | 66.0 | 0.4            | 70.6           | 32.8                  | 4.1                    | 131.4    | 106.7            |
| <b>Triple therapy</b>                             |      |                |                |                       |                        |          |                  |
| Metformin, sulphonylureas and insulin             | 65.0 | 0.6            | 76.2           | 30.3                  | 3.9                    | 132.2    | 90.8             |
| Metformin, sulphonylureas and glitazones          | 63.3 | 0.5            | 68.2           | 31.3                  | 3.8                    | 133.3    | 86.5             |
| Metformin, sulphonylureas and gliptins            | 63.5 | 0.7            | 70.4           | 31.3                  | 3.8                    | 132.4    | 83.6             |
| Metformin, sulphonylureas and other hypoglycaemic | 60.4 | 0.8            | 72.7           | 33.8                  | 4.0                    | 132.5    | 81.8             |
| All other drug combinations                       | 61.6 | 0.5            | 73.2           | 32.5                  | 3.9                    | 132.5    | 86.5             |

**Web table 2. Adjusted hazard ratios (95% CI) for each outcome for different adjusted models (see footnote)**

|                       |                                  | Adjusted HR<br>model A <sup>±</sup> | Adjusted HR<br>model B <sup>±</sup> | Adjusted HR<br>model D <sup>†</sup> | Adjusted HR<br>model E <sup>±</sup> |
|-----------------------|----------------------------------|-------------------------------------|-------------------------------------|-------------------------------------|-------------------------------------|
| <b>Blindness</b>      | glitazones <sup>§</sup>          | 0.77 (0.61 to 0.96 )                | 0.68 (0.55 to 0.86 )                | 0.71 (0.56 to 0.89 )                | 0.82 (0.59 to 1.13 )                |
|                       | gliptins <sup>§</sup>            | 0.87 (0.72 to 1.05 )                | 0.79 (0.66 to 0.96 )                | 0.83 (0.69 to 1.00 )                | 0.76 (0.58 to 1.00 )                |
|                       | metformin <sup>§</sup>           | 0.83 (0.78 to 0.89 )                | 0.68 (0.64 to 0.73 )                | 0.70 (0.65 to 0.75 )                | 0.71 (0.66 to 0.77 )                |
|                       | sulphonylureas <sup>§</sup>      | 1.13 (1.05 to 1.22 )                | 0.94 (0.87 to 1.01 )                | 1.06 (0.96 to 1.16 )                | 1.03 (0.92 to 1.16 )                |
|                       | insulin <sup>§</sup>             | 1.67 (1.45 to 1.93 )                | 1.38 (1.19 to 1.59 )                | 1.88 (1.60 to 2.20 )                | 1.52 (1.18 to 1.95 )                |
|                       | Other hypoglycaemic <sup>§</sup> | 0.96 (0.73 to 1.26 )                | 0.80 (0.61 to 1.06 )                | 0.83 (0.63 to 1.09 )                | 0.93 (0.64 to 1.35 )                |
|                       | insulin*age                      |                                     |                                     | 0.968 (0.957 to 0.980 )             |                                     |
|                       | Sulphonylureas*age               |                                     |                                     | 0.991 (0.985 to 0.997 )             |                                     |
| <b>Hyperglycaemia</b> | glitazones <sup>§</sup>          | 0.91 (0.79 to 1.06 )                | 0.84 (0.72 to 0.98 )                | 0.87 (0.75 to 1.02 )                | 0.82 (0.59 to 1.13 )                |
|                       | gliptins <sup>§</sup>            | 1.01 (0.89 to 1.14 )                | 0.94 (0.83 to 1.07 )                | 0.93 (0.82 to 1.05 )                | 0.76 (0.58 to 1.00 )                |
|                       | metformin <sup>§</sup>           | 0.71 (0.68 to 0.74 )                | 0.64 (0.62 to 0.66 )                | 0.65 (0.62 to 0.68 )                | 0.71 (0.66 to 0.77 )                |
|                       | sulphonylureas <sup>§</sup>      | 1.13 (1.08 to 1.19 )                | 1.05 (1.00 to 1.11 )                | 0.99 (0.94 to 1.04 )                | 1.03 (0.92 to 1.16 )                |
|                       | insulin <sup>§</sup>             | 1.89 (1.71 to 2.09 )                | 1.81 (1.63 to 2.00 )                | 1.49 (1.33 to 1.68 )                | 1.52 (1.18 to 1.95 )                |
|                       | Other hypoglycaemic <sup>§</sup> | 1.07 (0.90 to 1.28 )                | 0.96 (0.80 to 1.14 )                | 0.96 (0.81 to 1.15 )                | 0.93 (0.64 to 1.35 )                |
|                       | insulin*BMI                      |                                     |                                     | 0.972 (0.956 to 0.988 )             |                                     |
|                       | insulin*HBA1C                    |                                     |                                     | 1.008 (1.004 to 1.012 )             |                                     |
| <b>Hypoglycaemia</b>  | glitazones <sup>§</sup>          | 1.27 (1.14 to 1.41 )                | 1.18 (1.06 to 1.32 )                | 1.16 (1.02 to 1.31 )                | 1.38 (1.14 to 1.67 )                |
|                       | gliptins <sup>§</sup>            | 0.86 (0.77 to 0.97 )                | 0.82 (0.73 to 0.92 )                | 0.92 (0.82 to 1.03 )                | 0.96 (0.82 to 1.14 )                |
|                       | metformin <sup>§</sup>           | 0.58 (0.55 to 0.61 )                | 0.55 (0.52 to 0.58 )                | 0.54 (0.51 to 0.57 )                | 0.51 (0.47 to 0.55 )                |
|                       | sulphonylureas <sup>§</sup>      | 3.26 (3.09 to 3.44 )                | 2.86 (2.71 to 3.01 )                | 2.74 (2.60 to 2.89 )                | 3.99 (3.69 to 4.31 )                |
|                       | insulin <sup>§</sup>             | 4.90 (4.59 to 5.23 )                | 4.24 (3.97 to 4.53 )                | 4.44 (4.14 to 4.76 )                | 6.07 (5.47 to 6.73 )                |
|                       | Other hypoglycaemic <sup>§</sup> | 1.07 (0.92 to 1.24 )                | 0.98 (0.84 to 1.14 )                | 1.11 (0.95 to 1.31 )                | 1.35 (1.09 to 1.67 )                |
|                       | Glitazones*age                   |                                     |                                     | 1.015 (1.005 to 1.025 )             |                                     |
|                       | insulin*BMI                      |                                     |                                     | 0.972 (0.961 to 0.983 )             |                                     |
|                       | Metformin*age                    |                                     |                                     | 1.008 (1.004 to 1.012 )             |                                     |
|                       | metformin*HBA1C                  |                                     |                                     | 0.989 (0.986 to 0.992 )             |                                     |

|                       |                                  |                      |                      |                         |                      |
|-----------------------|----------------------------------|----------------------|----------------------|-------------------------|----------------------|
|                       | Other hypoglycaemic<br>*BMI      |                      |                      | 1.030 (1.006 to 1.054 ) |                      |
|                       | sulphonylureas*HBA1C             |                      |                      | 0.967 (0.964 to 0.970 ) |                      |
| <b>Amputation</b>     | glitazones <sup>§</sup>          | 0.80 (0.62 to 1.04 ) | 0.73 (0.57 to 0.95 ) | 0.76 (0.59 to 0.99 )    | 0.78 (0.51 to 1.18 ) |
|                       | gliptins <sup>§</sup>            | 0.96 (0.78 to 1.18 ) | 0.90 (0.73 to 1.10 ) | 0.87 (0.71 to 1.07 )    | 0.90 (0.67 to 1.22 ) |
|                       | metformin <sup>§</sup>           | 0.75 (0.68 to 0.81 ) | 0.69 (0.63 to 0.76 ) | 0.70 (0.63 to 0.76 )    | 0.75 (0.67 to 0.84 ) |
|                       | sulphonylureas <sup>§</sup>      | 1.34 (1.22 to 1.47 ) | 1.12 (1.01 to 1.23 ) | 1.14 (1.03 to 1.27 )    | 1.17 (1.01 to 1.37 ) |
|                       | insulin <sup>§</sup>             | 2.31 (1.99 to 2.68 ) | 1.76 (1.51 to 2.04 ) | 1.64 (1.41 to 1.91 )    | 1.83 (1.41 to 2.38 ) |
|                       | Other hypoglycaemic <sup>§</sup> | 1.02 (0.76 to 1.38 ) | 0.91 (0.68 to 1.23 ) | 0.91 (0.67 to 1.23 )    | 0.74 (0.45 to 1.22 ) |
|                       | Sulphonylureas*age               |                      |                      | 0.985 (0.978 to 0.991 ) |                      |
| <b>Kidney failure</b> | glitazones <sup>§</sup>          | 0.91 (0.69 to 1.19 ) | 0.74 (0.56 to 0.97 ) | 1.05 (0.80 to 1.38 )    | 0.84 (0.53 to 1.34 ) |
|                       | gliptins <sup>§</sup>            | 0.83 (0.65 to 1.07 ) | 0.74 (0.57 to 0.95 ) | 0.99 (0.77 to 1.27 )    | 1.03 (0.73 to 1.46 ) |
|                       | metformin <sup>§</sup>           | 0.17 (0.16 to 0.19 ) | 0.28 (0.25 to 0.31 ) | 0.41 (0.37 to 0.46 )    | 0.50 (0.44 to 0.57 ) |
|                       | sulphonylureas <sup>§</sup>      | 1.84 (1.68 to 2.01 ) | 1.03 (0.94 to 1.13 ) | 1.21 (1.10 to 1.33 )    | 1.36 (1.17 to 1.58 ) |
|                       | insulin <sup>§</sup>             | 2.67 (2.33 to 3.07 ) | 1.16 (1.01 to 1.34 ) | 1.45 (1.25 to 1.68 )    | 2.03 (1.60 to 2.57 ) |
|                       | Other hypoglycaemic <sup>§</sup> | 1.18 (0.85 to 1.66 ) | 0.83 (0.59 to 1.16 ) | 0.80 (0.56 to 1.14 )    | 0.91 (0.54 to 1.53 ) |

Model A: adjusted for age, sex, ethnicity, deprivation, calendar year, duration of diabetes plus other diabetes drug classes

Model B: model A + comorbidities (hypertension; cardiovascular disease; atrial fibrillation; chronic renal disease; rheumatoid arthritis; valvular heart disease; peripheral vascular disease) + existing complications (history of hypoglycaemia; hyperglycaemia; amputation; severe kidney failure; blindness) + use of other drugs (statins, aspirin, anticoagulants, diuretics, ACE inhibitors/angiotensin blockers, beta blockers, calcium channel blockers)

Model C (Table 3 in main paper): model B + clinical values (body mass index, cholesterol/HDL ratio, systolic blood pressure, serum creatinine, glycosylated haemoglobin)

Model D: model C + significant interaction terms shown in the table

Model E: model C having excluded prevalent users of sulphonylureas

**Web table 3 Adjusted hazard ratios with 95% confidence intervals for each outcome compared with no treatment. Treatment categories are mutually exclusive. Significantly increased hazard ratios are shown in red; decreased are shown in green. Non-significant results are shown in black.**

|                                                                | <i>Blindness<sup>†</sup></i> | <i>Hyperglycaemia<sup>†</sup></i> | <i>Hypoglycaemia<sup>†</sup></i> | <i>Amputation<sup>†</sup></i> | <i>Kidney disease<sup>†</sup></i> |
|----------------------------------------------------------------|------------------------------|-----------------------------------|----------------------------------|-------------------------------|-----------------------------------|
|                                                                | Adjusted HR                  | Adjusted HR                       | Adjusted HR                      | Adjusted HR                   | Adjusted HR                       |
| No current treatment                                           | 1.00                         | 1.00                              | 1.00                             | 1.00                          | 1.00                              |
| <b>Monotherapy</b>                                             |                              |                                   |                                  |                               |                                   |
| Metformin alone <sup>±</sup>                                   | 0.71 (0.66 to 0.77 )         | 0.63 (0.61 to 0.66 )              | 0.33 (0.30 to 0.36 )             | 0.70 (0.62 to 0.78 )          | 0.54 (0.47 to 0.62 )              |
| Sulphonylureas alone <sup>±</sup>                              | 1.01 (0.89 to 1.15 )         | 0.88 (0.80 to 0.96 )              | 2.39 (2.19 to 2.61 )             | 1.00 (0.84 to 1.18 )          | 1.42 (1.27 to 1.60 )              |
| Insulin alone <sup>±</sup>                                     | 1.39 (1.07 to 1.81 )         | 1.57 (1.34 to 1.85 )              | 6.93 (6.17 to 7.78 )             | 1.86 (1.45 to 2.39 )          | 1.56 (1.29 to 1.88 )              |
| Glitazones alone <sup>±</sup>                                  | 0.69 (0.22 to 2.16 )         | 0.95 (0.49 to 1.83 )              | 0.60 (0.19 to 1.86 )             | 1.30 (0.42 to 4.06 )          | 1.38 (0.62 to 3.10 )              |
| Gliptins alone <sup>±</sup>                                    | 0.99 (0.47 to 2.09 )         | 0.91 (0.54 to 1.54 )              | 0.27 (0.07 to 1.09 )             | 0.71 (0.23 to 2.22 )          | 1.91 (1.12 to 3.26 )              |
| Other hypoglycaemic drugs alone <sup>±</sup>                   | 0.58 (0.19 to 1.81 )         | 0.20 (0.05 to 0.82 )              | 2.11 (1.19 to 3.72 )             | -                             | 0.63 (0.34 to 1.17 )              |
| <b>Dual therapy</b>                                            |                              |                                   |                                  |                               |                                   |
| Metformin and sulphonylureas <sup>±</sup>                      | 0.67 (0.61 to 0.74 )         | 0.65 (0.60 to 0.69 )              | 1.97 (1.84 to 2.11 )             | 0.75 (0.66 to 0.85 )          | 0.41 (0.34 to 0.49 )              |
| Metformin and insulin <sup>±</sup>                             | 1.13 (0.86 to 1.48 )         | 1.24 (1.03 to 1.49 )              | 4.69 (4.12 to 5.35 )             | 1.24 (0.93 to 1.64 )          | 0.61 (0.35 to 1.06 )              |
| Metformin and glitazones <sup>±</sup>                          | 0.62 (0.42 to 0.92 )         | 0.38 (0.28 to 0.51 )              | 0.44 (0.29 to 0.67 )             | 0.40 (0.21 to 0.74 )          | 0.38 (0.18 to 0.81 )              |
| Metformin and gliptins <sup>±</sup>                            | 0.51 (0.35 to 0.74 )         | 0.49 (0.39 to 0.61 )              | 0.40 (0.28 to 0.59 )             | 0.59 (0.38 to 0.90 )          | 0.32 (0.15 to 0.67 )              |
| Metformin and other hypoglycaemic <sup>±</sup>                 | 0.59 (0.35 to 0.99 )         | 0.67 (0.50 to 0.90 )              | 0.91 (0.63 to 1.30 )             | 0.65 (0.36 to 1.18 )          | 0.31 (0.10 to 0.97 )              |
| Sulphonylureas and insulin <sup>±</sup>                        | 1.52 (1.05 to 2.20 )         | 1.66 (1.20 to 2.30 )              | 7.83 (6.60 to 9.29 )             | 1.49 (0.98 to 2.28 )          | 1.93 (1.45 to 2.57 )              |
| Sulphonylureas and glitazones <sup>±</sup>                     | 0.57 (0.27 to 1.20 )         | 1.22 (0.77 to 1.95 )              | 4.33 (3.31 to 5.65 )             | 1.43 (0.79 to 2.61 )          | 1.16 (0.69 to 1.94 )              |
| Sulphonylureas and gliptins <sup>±</sup>                       | 0.94 (0.56 to 1.60 )         | 0.62 (0.36 to 1.07 )              | 1.94 (1.36 to 2.77 )             | 0.91 (0.48 to 1.70 )          | 1.74 (1.14 to 2.65 )              |
| Sulphonylureas and other hypoglycaemic <sup>±</sup>            | 0.49 (0.12 to 1.97 )         | 0.46 (0.15 to 1.44 )              | 3.97 (2.49 to 6.32 )             | 1.41 (0.52 to 3.77 )          | 1.29 (0.61 to 2.74 )              |
| <b>Triple therapy</b>                                          |                              |                                   |                                  |                               |                                   |
| Metformin, sulphonylureas and insulin <sup>±</sup>             | 0.97 (0.69 to 1.35 )         | 0.93 (0.71 to 1.21 )              | 4.31 (3.69 to 5.03 )             | 0.90 (0.61 to 1.32 )          | 0.58 (0.29 to 1.16 )              |
| Metformin, sulphonylureas and glitazones <sup>±</sup>          | 0.48 (0.34 to 0.67 )         | 0.63 (0.50 to 0.80 )              | 2.07 (1.77 to 2.41 )             | 0.49 (0.33 to 0.73 )          | 0.66 (0.41 to 1.06 )              |
| Metformin, sulphonylureas and gliptins <sup>±</sup>            | 0.58 (0.44 to 0.77 )         | 0.69 (0.57 to 0.84 )              | 1.66 (1.42 to 1.94 )             | 0.69 (0.51 to 0.92 )          | 0.37 (0.21 to 0.65 )              |
| Metformin, sulphonylureas and other hypoglycaemic <sup>±</sup> | 0.65 (0.42 to 1.02 )         | 0.65 (0.48 to 0.88 )              | 1.41 (1.08 to 1.85 )             | 0.59 (0.35 to 1.01 )          | 0.51 (0.21 to 1.22 )              |
| All other drug combinations <sup>±</sup>                       | 0.67 (0.45 to 0.99 )         | 0.91 (0.72 to 1.14 )              | 2.95 (2.48 to 3.51 )             | 0.87 (0.60 to 1.27 )          | 0.87 (0.53 to 1.41 )              |

<sup>±</sup> compared with periods not on any treatment.

Notes: significantly increased HR shown in red; significantly decreased HR shown in green; non-significant results shown in black.

†Hazard ratios adjusted for the following: sex; age; calendar year; duration since diagnosis of diabetes (5 levels); ethnicity (9 levels) Townsend deprivation score, smoking status (5 levels); use of other diabetes drugs; use of anticoagulant thiazide ace angiotensin 2 blockers; calcium channel blockers; statins; aspirin; existing complications (blindness, hyperglycaemic coma; hypoglycaemia; amputation; severe kidney failure); hypertension; cardiovascular disease; atrial fibrillation; chronic renal disease; rheumatoid arthritis; valvular heart disease; peripheral vascular disease; body mass index; systolic blood pressure; HBA1C; serum creatinine; cholesterol/HDL ratio

**Web table 4 Adjusted hazard ratios with 95% confidence intervals for each outcome compared with no current treatment, excluding prevalent users of sulphonylureas. Treatment categories are mutually exclusive.**

|                                                                | <i>Blindness</i> <sup>†</sup> | <i>Hyperglycaemia</i> <sup>†</sup> | <i>Hypoglycaemia</i> <sup>†</sup> | <i>Amputation</i> <sup>†</sup> | <i>Kidney disease</i> <sup>†</sup> |
|----------------------------------------------------------------|-------------------------------|------------------------------------|-----------------------------------|--------------------------------|------------------------------------|
|                                                                | Adjusted HR                   | Adjusted HR                        | Adjusted HR                       | Adjusted HR                    | Adjusted HR                        |
| No treatment                                                   | 1.00                          | 1.00                               | 1.00                              | 1.00                           | 1.00                               |
| <b>Monotherapy</b>                                             |                               |                                    |                                   |                                |                                    |
| Metformin alone <sup>±</sup>                                   | 0.73 (0.67 to 0.79)           | 0.64 (0.62 to 0.67)                | 0.36 (0.33 to 0.40)               | 0.75 (0.66 to 0.85)            | 0.59 (0.51 to 0.68)                |
| Sulphonylureas alone <sup>±</sup>                              | 1.19 (0.97 to 1.47)           | 1.05 (0.91 to 1.21)                | 3.18 (2.76 to 3.68)               | 1.23 (0.93 to 1.64)            | 1.78 (1.47 to 2.15)                |
| Insulin alone <sup>±</sup>                                     | 1.81 (1.28 to 2.56)           | 1.63 (1.36 to 1.96)                | 7.46 (6.39 to 8.72)               | 1.90 (1.28 to 2.83)            | 2.35 (1.75 to 3.15)                |
| Glitazones alone <sup>±</sup>                                  | 0.80 (0.26 to 2.48)           | 0.93 (0.47 to 1.87)                | 0.89 (0.28 to 2.75)               | 1.72 (0.55 to 5.35)            | 0.96 (0.31 to 2.99)                |
| Gliptins alone <sup>±</sup>                                    | 0.93 (0.39 to 2.24)           | 0.92 (0.52 to 1.63)                | 0.41 (0.10 to 1.64)               | 0.65 (0.16 to 2.63)            | 2.43 (1.33 to 4.43)                |
| Other drugs alone <sup>±</sup>                                 | 0.71 (0.23 to 2.20)           | 0.23 (0.06 to 0.93)                | 2.47 (1.40 to 4.36)               | n/a                            | 1.43 (0.70 to 2.93)                |
| <b>Dual therapy</b>                                            |                               |                                    |                                   |                                |                                    |
| Metformin & sulphonylureas <sup>±</sup>                        | 0.71 (0.60 to 0.83)           | 0.80 (0.73 to 0.87)                | 2.46 (2.23 to 2.72)               | 0.88 (0.73 to 1.08)            | 0.52 (0.40 to 0.70)                |
| Metformin & insulin <sup>±</sup>                               | 0.93 (0.57 to 1.53)           | 1.04 (0.81 to 1.34)                | 5.98 (4.96 to 7.21)               | 1.64 (1.05 to 2.55)            | 1.03 (0.51 to 2.10)                |
| Metformin and glitazones <sup>±</sup>                          | 0.64 (0.42 to 0.98)           | 0.38 (0.28 to 0.52)                | 0.51 (0.32 to 0.80)               | 0.53 (0.28 to 1.00)            | 0.36 (0.16 to 0.82)                |
| Metformin and gliptins <sup>±</sup>                            | 0.53 (0.35 to 0.80)           | 0.50 (0.40 to 0.64)                | 0.44 (0.29 to 0.67)               | 0.66 (0.41 to 1.05)            | 0.40 (0.19 to 0.84)                |
| Metformin and other hypoglycaemic <sup>±</sup>                 | 0.65 (0.38 to 1.10)           | 0.62 (0.45 to 0.85)                | 0.97 (0.65 to 1.43)               | 0.66 (0.33 to 1.33)            | 0.38 (0.12 to 1.20)                |
| Sulphonylureas and insulin <sup>±</sup>                        | 1.14 (0.43 to 3.05)           | 1.13 (0.61 to 2.11)                | 11.06 (8.09 to 15.11)             | 1.61 (0.60 to 4.32)            | 2.74 (1.61 to 4.65)                |
| Sulphonylureas and glitazones <sup>±</sup>                     | n/a                           | 1.09 (0.52 to 2.30)                | 7.17 (4.49 to 11.44)              | 1.98 (0.64 to 6.17)            | 1.40 (0.52 to 3.80)                |
| Sulphonylureas and gliptins <sup>±</sup>                       | 1.06 (0.47 to 2.37)           | 0.56 (0.26 to 1.17)                | 2.30 (1.30 to 4.06)               | 1.39 (0.58 to 3.38)            | 1.79 (0.88 to 3.62)                |
| Sulphonylureas and other hypoglycaemic <sup>±</sup>            | 1.35 (0.19 to 9.58)           | 0.79 (0.20 to 3.18)                | 6.03 (2.70 to 13.48)              | 1.77 (0.25 to 12.64)           | n/a                                |
| <b>Triple therapy</b>                                          |                               |                                    |                                   |                                |                                    |
| Metformin, sulphonylureas and insulin <sup>±</sup>             | 1.16 (0.55 to 2.44)           | 1.02 (0.67 to 1.56)                | 7.10 (5.37 to 9.40)               | 1.04 (0.43 to 2.51)            | 0.88 (0.22 to 3.55)                |
| Metformin, sulphonylureas and glitazones <sup>±</sup>          | 0.84 (0.46 to 1.52)           | 0.72 (0.51 to 1.02)                | 3.15 (2.36 to 4.20)               | 0.47 (0.17 to 1.25)            | 0.87 (0.36 to 2.13)                |
| Metformin, sulphonylureas and gliptins <sup>±</sup>            | 0.51 (0.30 to 0.86)           | 0.59 (0.45 to 0.78)                | 2.55 (2.03 to 3.21)               | 0.96 (0.61 to 1.53)            | 0.26 (0.08 to 0.80)                |
| Metformin, sulphonylureas and other hypoglycaemic <sup>±</sup> | 0.52 (0.17 to 1.61)           | 0.69 (0.42 to 1.13)                | 1.58 (0.91 to 2.74)               | 0.41 (0.10 to 1.63)            | 0.41 (0.06 to 2.92)                |
| All other drug combinations <sup>±</sup>                       | 0.71 (0.38 to 1.33)           | 1.04 (0.78 to 1.37)                | 3.54 (2.74 to 4.57)               | 0.65 (0.31 to 1.37)            | 0.96 (0.45 to 2.04)                |

<sup>±</sup> compared with periods not on any treatment.

Notes: significantly increased HR shown in red; significantly decreased HR shown in green; non-significant results shown in black.

†Hazard ratios adjusted for the following: sex; age; duration since diagnosis of diabetes (5 levels); ethnicity (9 levels) Townsend deprivation score smoking status (5 levels) use of anticoagulant thiazide ace angiotensin 2 blockers; calcium channel blockers; statins; aspirin; existing complications (blindness, hyperglycaemic coma; hypoglycaemia; amputation; severe kidney failure); hypertension; cardiovascular disease; atrial fibrillation; chronic renal disease; rheumatoid arthritis; valvular heart disease; peripheral vascular disease; body mass index; systolic blood pressure; HBA1C; serum creatinine; cholesterol/HDL ratio
